# Supplementary material for: An excited-state intramolecular proton-transfer responsive nanoscale MOF for dual sensing of water and chromate ions
Source: Royal Society of Chemistry journal article supplement (doi:10.1039/d1tc06021j), 2022-01-01
Supplement: d1tc06021j1.pdf [file d1tc06021j1.pdf]

## **Supporting Information**

### **An Excited-State Intramolecular Proton-Transfer Responsive Nanoscale MOF for the Dual Sensing of Water and Chromate Ions**

Adrija Ghosh<sup>a</sup>, Nivedita Sikdar<sup>b</sup> and Tapas Kumar Maji<sup>a,b\*</sup>

*<sup>a</sup>New Chemistry Unit (NCU), <sup>b</sup>Chemistry and Physics of Material Unit (CPMU), School of Advanced Materials (SAMat), Jawaharlal Nehru Centre for Advanced Scientific Research, Jakkur, Bangalore-560064, India*

*\*Email: [tmaji@jncasr.ac.in](mailto:tmaji@jncasr.ac.in), [www.jncasr.ac.in/tmaji](http://www.jncasr.ac.in/tmaji); Tel: 91-8022082826*

## Experimental Section:

**Materials:** All the reagents and solvents were used as obtained from commercial supplies without any further purification. 2,5-Dihydroxyterephthalic acid (DHT), 1,2-Di(4-pyridyl)ethylene (bpee), Dodecanoic acid (dda), Zinc nitrate hexahydrate ( $\text{Zn}(\text{NO}_3)_2 \cdot \text{H}_2\text{O}$ ), and Potassium chromate ( $\text{K}_2\text{CrO}_4$ ) were procured from Aldrich Chemical Co. Ltd. HPLC grade solvents were used for photophysical studies.

## Physical Measurements:

Elemental analyses were performed in Thermo Scientific Flash 2000 CHN analyser. Thermal stability of the materials was analysed by Thermogravimetric analysis (TGA) using Mettler-Toledo TGA 850 under an inert atmosphere ( $\text{N}_2$  flow rate =  $50 \text{ mol min}^{-1}$ ) in the temperature range of 25-850°C at a heating rate of 5°C/min. Powder X-ray diffraction (PXRD) patterns were recorded on a Bruker D8 Discover instrument (40 kV, 30 mA) by using Cu-K $\alpha$  radiation. Electronic absorption spectra were recorded on a Perkin Elmer Model Lambda 900 Spectrophotometer. Photoluminescence studies were carried out in a Fluorolog 3.21 spectrofluorometer (HORIBA Jobin-Yvon) instrument. The fluorescence decay profiles of the samples were recorded in a Horiba Delta Flex time-correlated single-photon counting (TCSPC). In order to measure the photoluminescence (PL) quantum yield values, 0.5 mg Zn-db MOF was dispersed in 1 mL solvent. The PL quantum yield was determined in solution state by an absolute method using a spectrofluorometer equipped with a 120 mm integrating sphere with a BENFLEC coated inner face (FLS1000 spectrometer Edinburgh Instruments). FTIR spectra of the compounds were recorded on a Bruker IFS 66v/S spectrophotometer using the KBr pellets in the region 4000–400  $\text{cm}^{-1}$ . Inductively Coupled Plasma-Optical Emission Spectroscopy (ICP-OES) measurements were recorded on Perkin Elmer Optima 7000dv ICP-OES.  $\text{N}_2$  adsorption isotherm at 77 K was recorded with the dehydrated sample using the Quantachrome Autosorb iQ analyser, wherein, 100 mg of the sample was degassed at 120°C at 1 bar vacuum for 10 hours before commencing measurements. Morphological studies were performed employing Lica-S440I Field Emission Scanning Electron Microscope (FE-SEM) with an accelerating voltage of 100 kV under high vacuum. Transmission Electron Microscopy (TEM) analysis was performed using JEOL JEM-3010 with an accelerating voltage of 300 kV.

**Table S1:** Tabulated representation of the coordination modulation method employed for synthesis.

| Compound Name | Reactants                                 |             |                                                             |            | dda/Na <sub>2</sub> H <sub>2</sub> DHT (r) |
|---------------|-------------------------------------------|-------------|-------------------------------------------------------------|------------|--------------------------------------------|
|               | Na <sub>2</sub> H <sub>2</sub> DHT (mmol) | bpee (mmol) | Zn(NO <sub>3</sub> ) <sub>2</sub> ·6H <sub>2</sub> O (mmol) | dda (mmol) |                                            |
| Zn-db         | 0.187                                     | 0.062       | 0.25                                                        | -          | -                                          |
| Zn-db-1       | 0.187                                     | 0.062       | 0.25                                                        | 0.0625     | 0.33                                       |
| Zn-db-2       | 0.187                                     | 0.062       | 0.25                                                        | 0.125      | 0.66                                       |
| Zn-db-3       | 0.187                                     | 0.062       | 0.25                                                        | 0.25       | 1.33                                       |

#### Single crystal X-ray Diffraction:

X-ray single crystal structural data of **Zn-db** (CCDC 2114164) were collected on a Bruker Smart-CCD diffractometer equipped with a normal focus, 2.4 kW sealed tube X-ray source with graphite monochromated Mo-K $\alpha$  radiation ( $\lambda = 0.71073 \text{ \AA}$ ) operating at 50 kV and 30 mA. The program SAINT<sup>1</sup> was used for integration of diffraction profiles and absorption correction was made with SADABS<sup>2</sup> program. All the structures were solved by SIR 92<sup>3</sup> and refined by the full matrix least-squares method using SHELXL-97.<sup>4</sup> All the hydrogen atoms were fixed by HFIX and placed in ideal positions. Potential solvent accessible area or void space was calculated using the PLATON multipurpose crystallographic software.<sup>5</sup> All crystallographic and structure refinement data of **Zn-db** are summarized in Table S2. Selected bond lengths and angles for **Zn-db** are given in Tables S3 and S4. All calculations were carried out using SHELXL 97, PLATON, SHELXS 97 and WinGX system, Ver 1.70.01.<sup>6</sup> Solvent molecules have not been assigned.

**Table S2:** Crystal data and structure refinement parameters of **Zn-db**.

| Parameters        | Zn-db                                                           |
|-------------------|-----------------------------------------------------------------|
| Empirical formula | C <sub>18</sub> H <sub>8</sub> NO <sub>10</sub> Zn <sub>2</sub> |
| Formula weight    | 528.99                                                          |
| Crystal system    | Monoclinic                                                      |

|                                                                          |              |
|--------------------------------------------------------------------------|--------------|
| Space group                                                              | <i>C2/c</i>  |
| <i>a</i> , Å                                                             | 20.631(5)    |
| <i>b</i> , Å                                                             | 25.846(5)    |
| <i>c</i> , Å                                                             | 14.114(5)    |
| <i>V</i> , Å <sup>3</sup>                                                | 6289.0(3)    |
| <i>Z</i>                                                                 | 8            |
| <i>T</i> , K                                                             | 293          |
| $\mu$ , mm <sup>-1</sup>                                                 | 1.562        |
| <i>D</i> <sub>calcd</sub> , g/cm <sup>3</sup>                            | 1.117        |
| <i>F</i> (000)                                                           | 4056         |
| Reflections [ <i>I</i> > 2 $\sigma$ ( <i>I</i> )]                        | 4354         |
| Unique reflections                                                       | 5593         |
| Total reflections                                                        | 55040        |
| <i>R</i> <sub>int</sub>                                                  | 0.076        |
| GOF on <i>F</i> <sup>2</sup>                                             | 1.125        |
| <i>R</i> <sub>1</sub> [ <i>I</i> > 2 $\sigma$ ( <i>I</i> )] <sup>a</sup> | 0.0687       |
| <i>R</i> <sub>w</sub> [all data] <sup>b</sup>                            | 0.0869       |
| $\Delta\rho$ max/min [e Å <sup>-3</sup> ]                                | 2.042, -0.77 |

$${}^aR_1 = \frac{\sum ||F_o| - |F_c||}{\sum |F_o|}; {}^bR_w = \left[ \frac{\sum \{w(F_o^2 - F_c^2)^2\}}{\sum \{w(F_o^2)^2\}} \right]^{1/2}$$

**Table S3:** Selected Bond Distances (Å) for **Zn-db**.

| Bonds  | Bond lengths (Å) | Bonds  | Bond lengths (Å) |
|--------|------------------|--------|------------------|
| Zn1-O1 | 2.023(4)         | Zn2-O3 | 1.921(3)         |
| Zn1-N1 | 2.090(4)         | Zn2-O6 | 1.956(4)         |
| Zn1-O2 | 2.047(5)         | Zn2-O7 | 2.004(5)         |
| Zn1-O9 | 2.178(9)         |        |                  |

Symmetry code: a=-x,y,1/2-z

**Table S4:** Selected bond angles (°) for **Zn-db**.

| Bonds     | Bond angles (°) | Bonds     | Bond angles (°) |
|-----------|-----------------|-----------|-----------------|
| O1-Zn1-N1 | 176.5(2)        | O2-Zn1-O8 | 178.0(2)        |

|           |         |           |          |
|-----------|---------|-----------|----------|
| O1-Zn1-O2 | 86.1(2) | O9-Zn1-O5 | 174.0(3) |
| O1-Zn1-O9 | 90.8(3) | O9-Zn1-O8 | 86.7(3)  |
| O1-Zn1-O5 | 88.7(2) | O5-Zn1-O8 | 87.4(2)  |
| O1-Zn1-O8 | 93.6(2) | O3-Zn2-O6 | 125.2(2) |
| N1-Zn1-O2 | 92.0(2) | O3-Zn2-O7 | 95.0(2)  |
| N1-Zn1-O9 | 92.2(2) | O3-Zn2-O1 | 117.9(2) |
| N1-Zn1-O5 | 88.5(2) | O6-Zn2-O7 | 100.0(2) |
| N1-Zn1-O8 | 88.4(2) | O6-Zn2-O1 | 110.0(2) |
| O2-Zn1-O9 | 91.4(3) | O7-Zn2-O1 | 101.8(2) |
| O2-Zn1-O5 | 94.6(2) |           |          |

Symmetry code:  $a=-x,y,1/2-z$

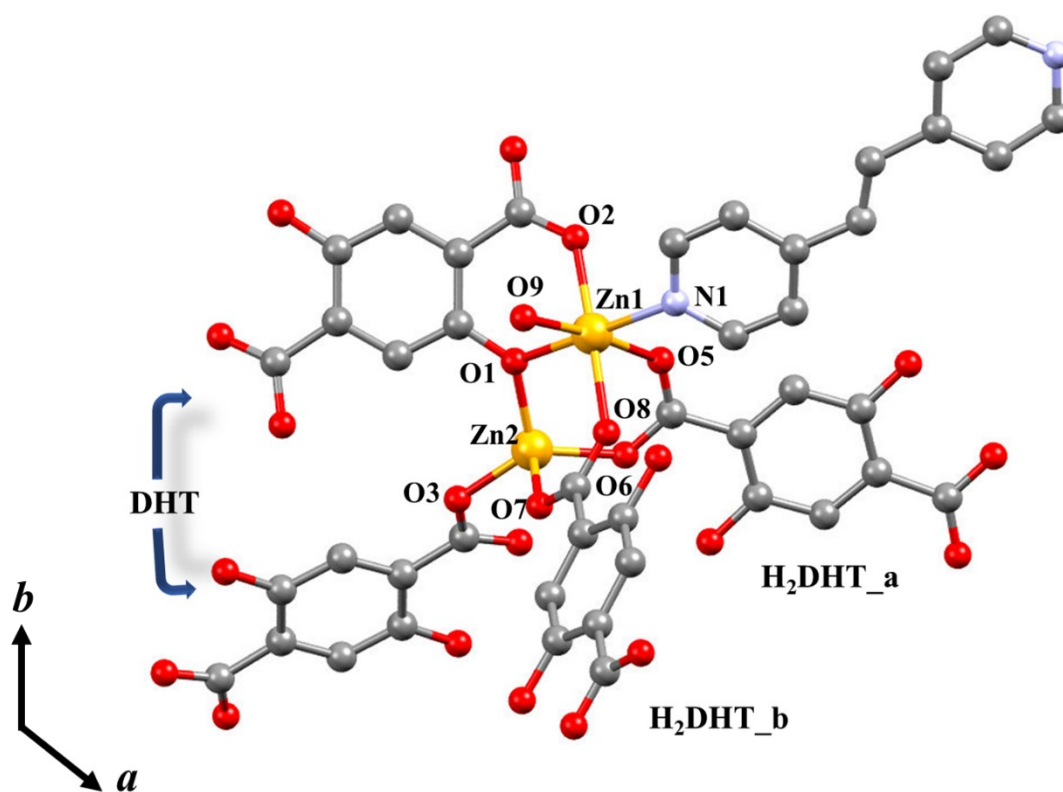

Fig. S1 Coordination environment of Zn1 and Zn2 in Zn-db.

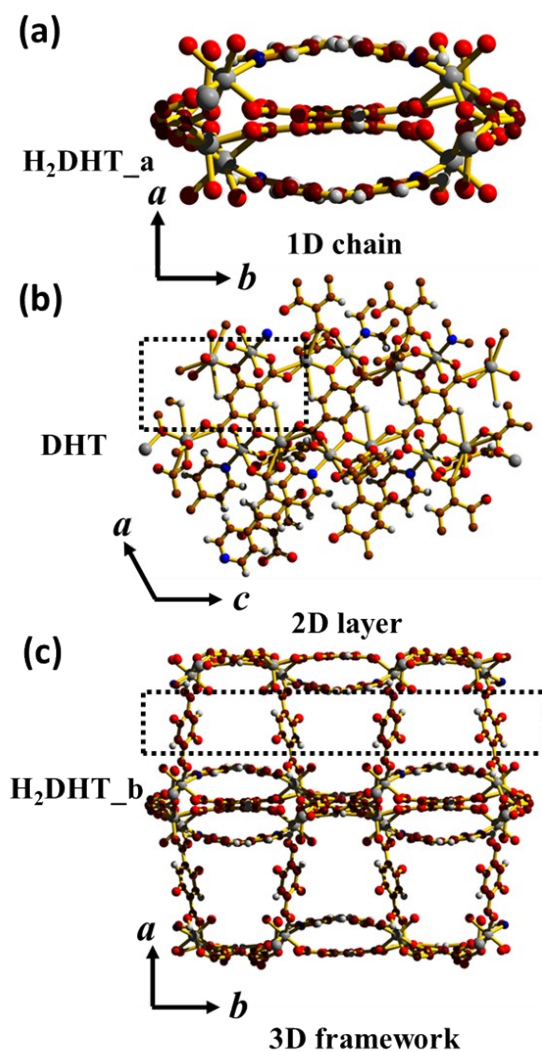

**Fig. S2** View of the crystal structure of **Zn-db** along different crystallographic directions: (a) 1D coordination chain. (b) 2D layer along the  $ac$  plane. (c) 3D framework.

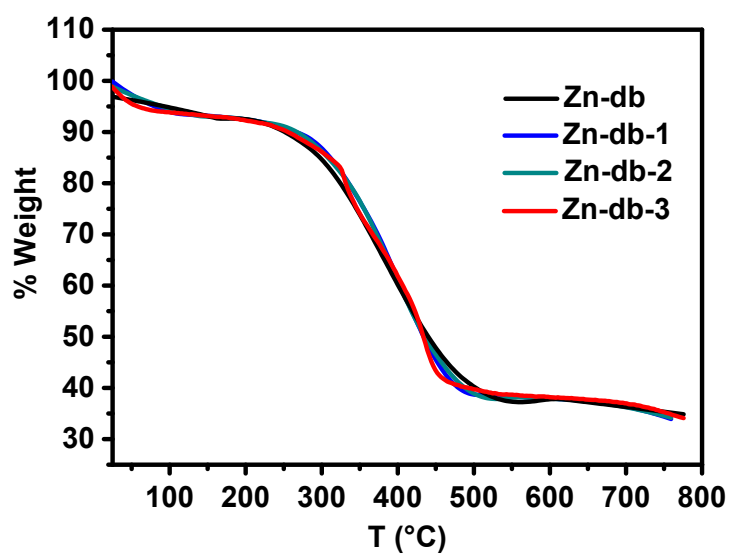

**Fig. S3** TGA profiles for **Zn-db**, **Zn-db-1**, **Zn-db-2** and **Zn-db-3**.

**Table S5:** Summary of N<sub>2</sub> adsorption analysis of bulk Zn-db and its downsized analogues.

| Sample                | Zn-db                            | Zn-db-1                           | Zn-db-2                           | Zn-dn-3                             |
|-----------------------|----------------------------------|-----------------------------------|-----------------------------------|-------------------------------------|
| N <sub>2</sub> uptake | 7 m <sup>3</sup> g <sup>-1</sup> | 11 m <sup>3</sup> g <sup>-1</sup> | 57 m <sup>3</sup> g <sup>-1</sup> | 144 cm <sup>3</sup> g <sup>-1</sup> |
| BET surface area      | 4 m <sup>2</sup> g <sup>-1</sup> | 18 m <sup>2</sup> g <sup>-1</sup> | 66 m <sup>2</sup> g <sup>-1</sup> | 365 m <sup>2</sup> g <sup>-1</sup>  |

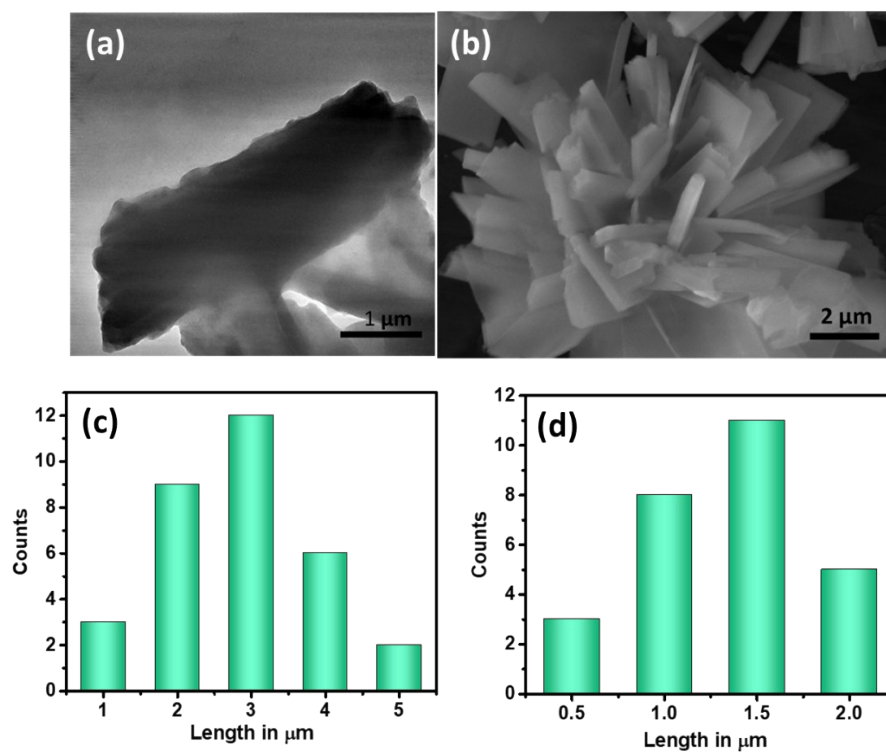

**Fig. S4 (a)** TEM image of Zn-db-1, **(b)** FESEM image of Zn-db-1, **(c)** Average length of mesosheets, **(d)** Average width of mesosheets.

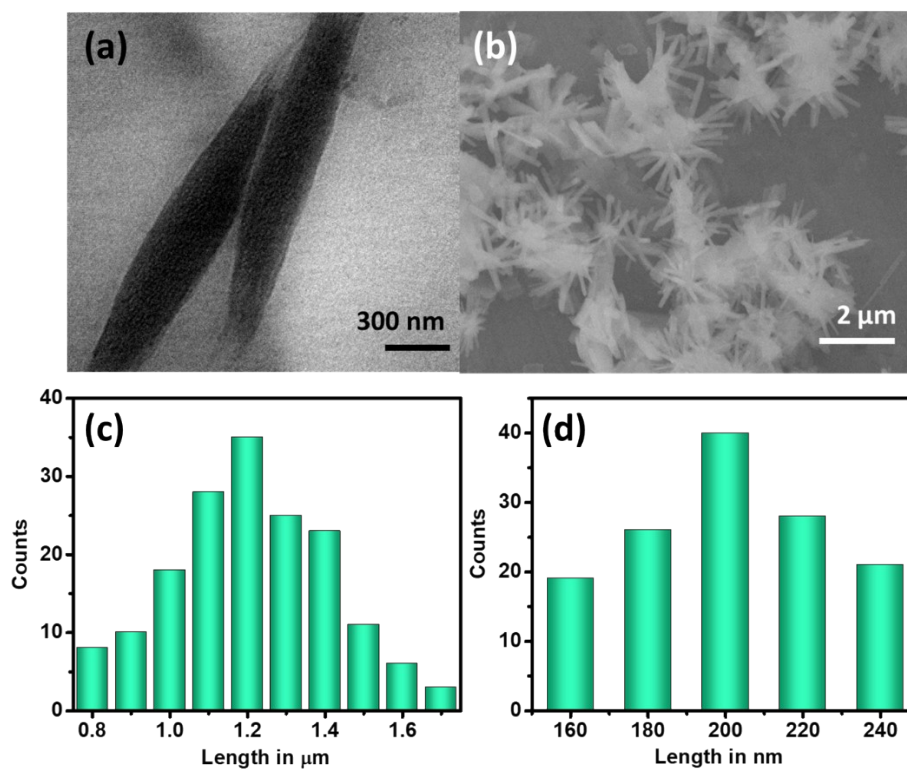

**Fig. S5** (a) TEM image of **Zn-db-2**, (b) FESEM images of **Zn-db-2**, (c) Average length of nanorods, (d) Average diameters of nanorods.

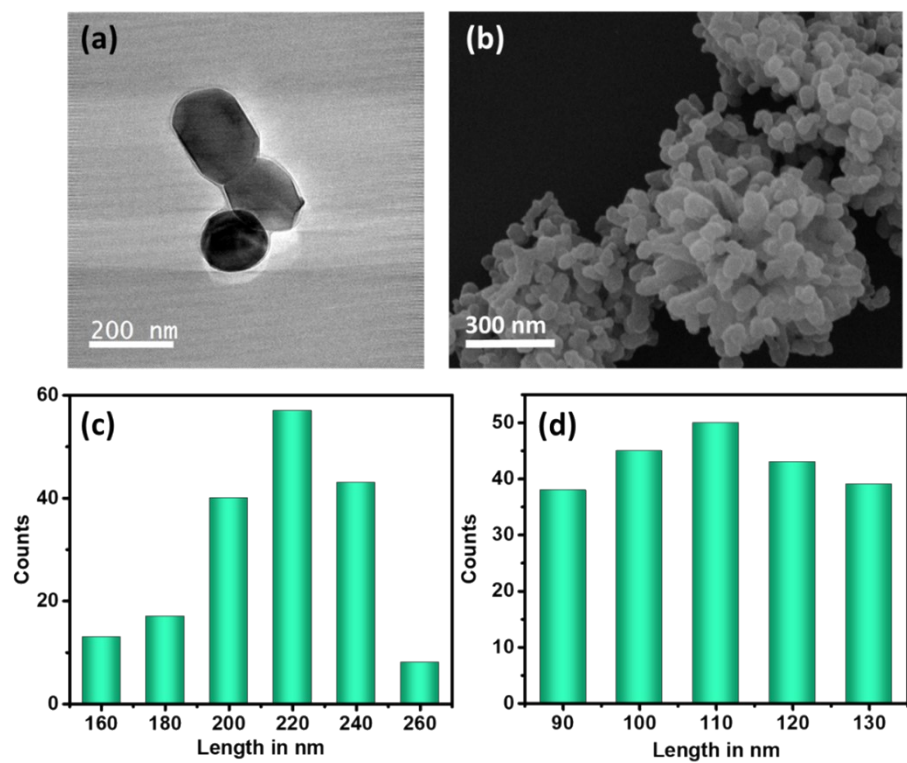

**Fig. S6** (a) TEM images of **Zn-db-3**, (b) FESEM image of **Zn-db-3**, (c) Average length of nanoparticles along major axis, (d) Average length of nanoparticles along minor axis.



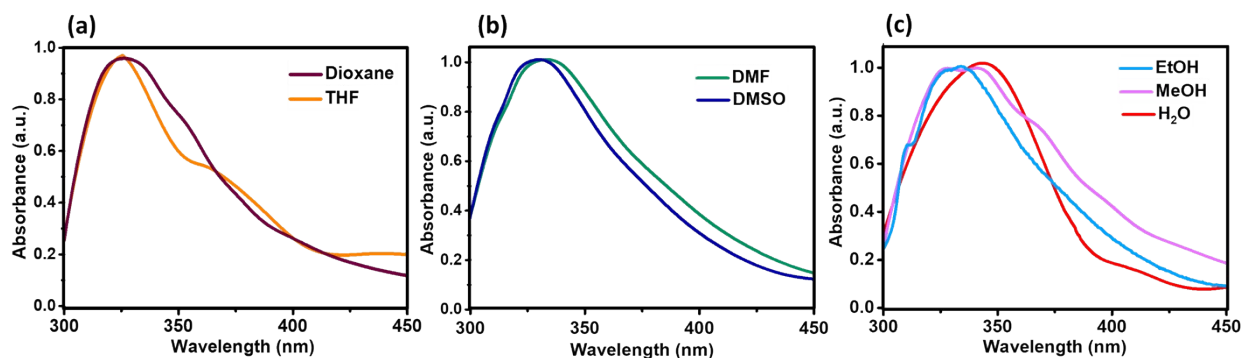

**Fig. S7** Absorption spectra of **Zn-db-3** in (a) non-polar solvents, (b) polar aprotic solvents, (c) polar protic solvents.

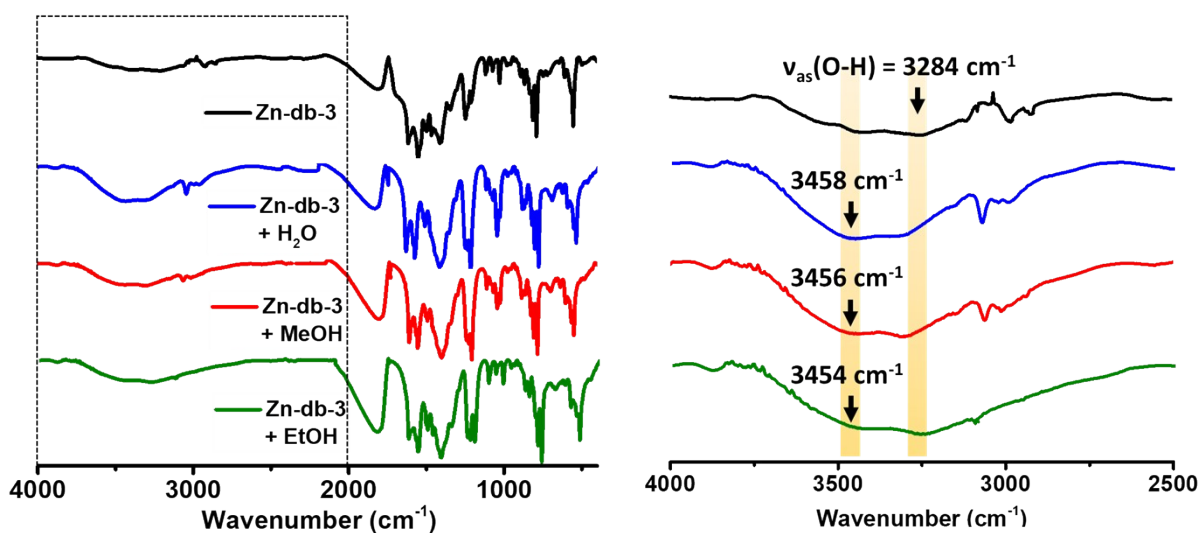

**Fig. S8** FT-IR spectra of pristine dry **Zn-db-3** and **Zn-db-3** upon exposure to trace amounts of polar protic solvents ( $\text{H}_2\text{O}$ , MeOH, and EtOH).

**Table S6.** Summary of Time-resolved photoluminescence decay of **Zn-db-3** in different solvents.

| Solvent              | $B_1$  | $B_2$  | $\tau_1$ (ns) | $\tau_2$ (ns) | $\tau_{av}$ (ns) |
|----------------------|--------|--------|---------------|---------------|------------------|
| THF                  | 29.99% | 70.01% | 1.09          | 5.23          | 3.98             |
| Dioxane              | 50.09% | 49.91% | 1.00          | 7.48          | 4.23             |
| DMF                  | 14.05% | 85.95% | 2.91          | 9.28          | 8.38             |
| DMSO                 | 11.93% | 88.07% | 2.64          | 9.29          | 8.49             |
| MeOH                 | 13.28% | 86.72% | 2.45          | 7.82          | 7.10             |
| EtOH                 | 29.20% | 70.80% | 2.18          | 9.01          | 7.01             |
| $\text{H}_2\text{O}$ | 100%   | -      | 4.53          | -             | 4.53             |

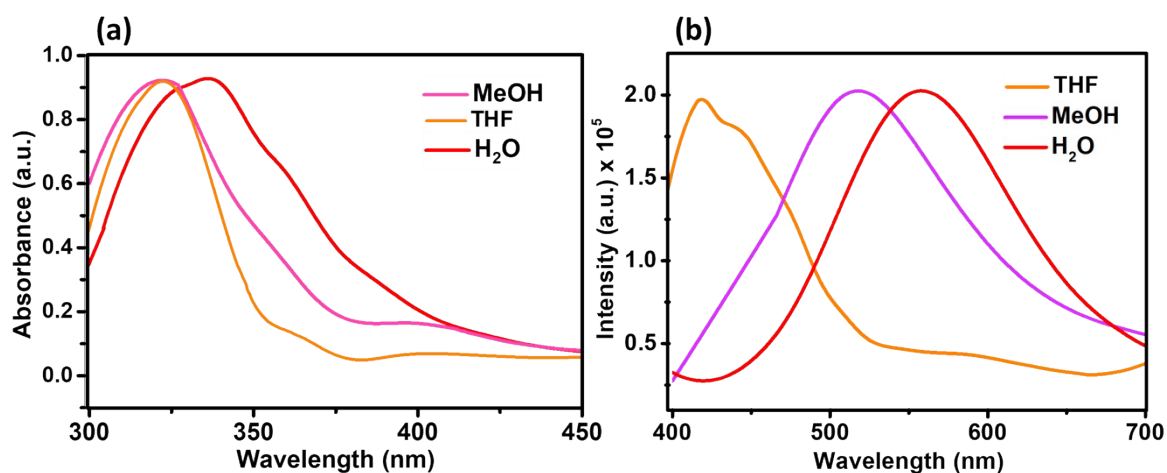

**Fig. S9** (a) Absorption spectra of H<sub>4</sub>DHT linker in different solvents. (b) Emission spectra of H<sub>4</sub>DHT in different solvents.

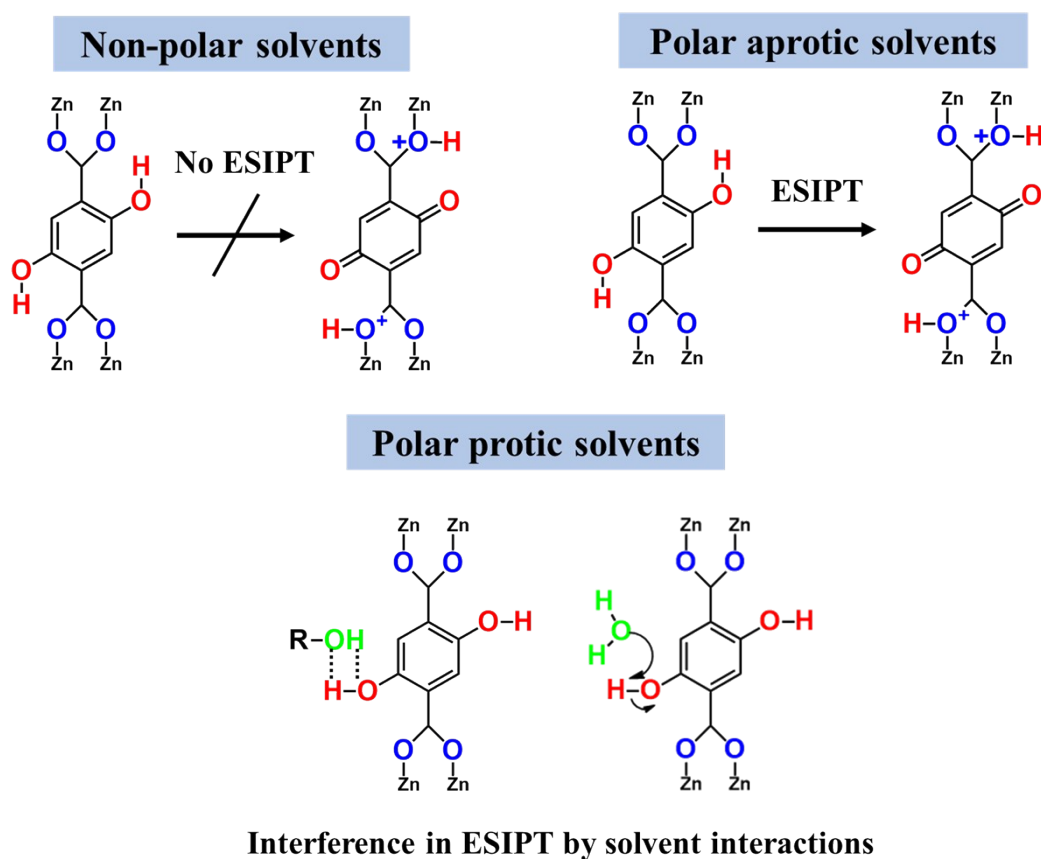

**Fig. S10** Schematic representation of ES IPT in Zn-db-3 in non-polar, polar aprotic, and polar protic solvents.

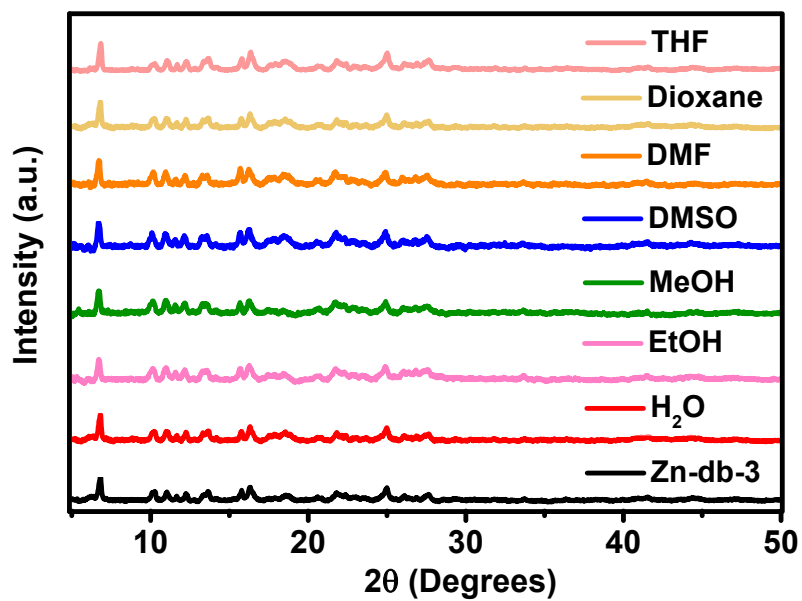

Fig. S11 PXRD patterns of **Zn-db-3** after immersion in different solvents.

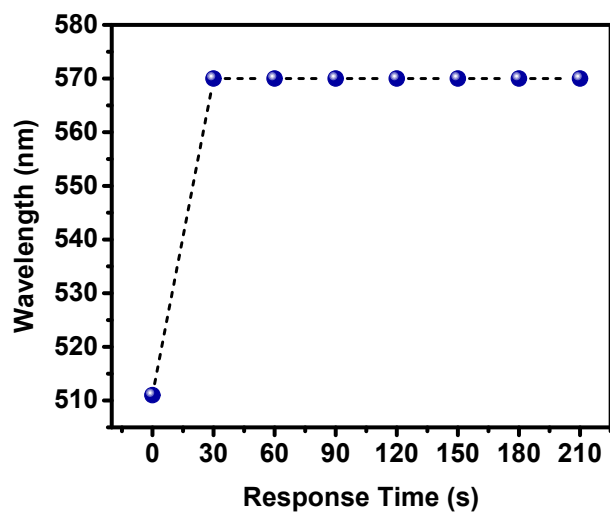

Fig. S12 Response time of **Zn-db-3** for the detection of 8% v/v H<sub>2</sub>O in EtOH.

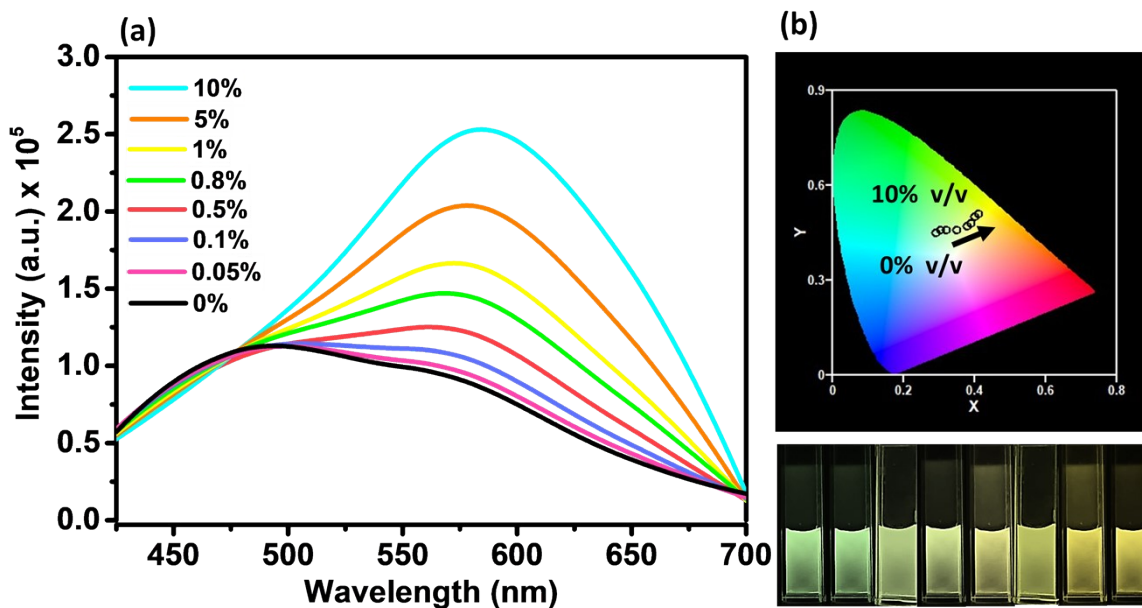

**Fig. S13** (a) Enhanced emission intensity and shift observed upon addition of aliquots of H<sub>2</sub>O to a dispersion of Zn-db-3 in MeOH. (b) CIE coordinates depicting the shift in emission and corresponding photographs taken under UV light.

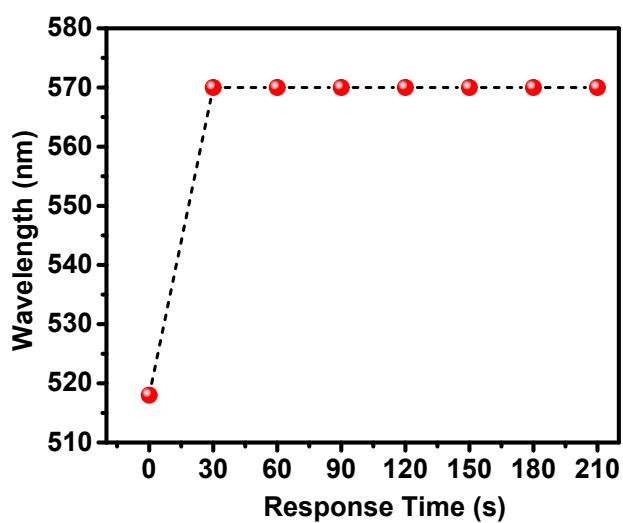

**Fig. S14** Response time of Zn-db-3 for the detection of 8% v/v H<sub>2</sub>O in MeOH.

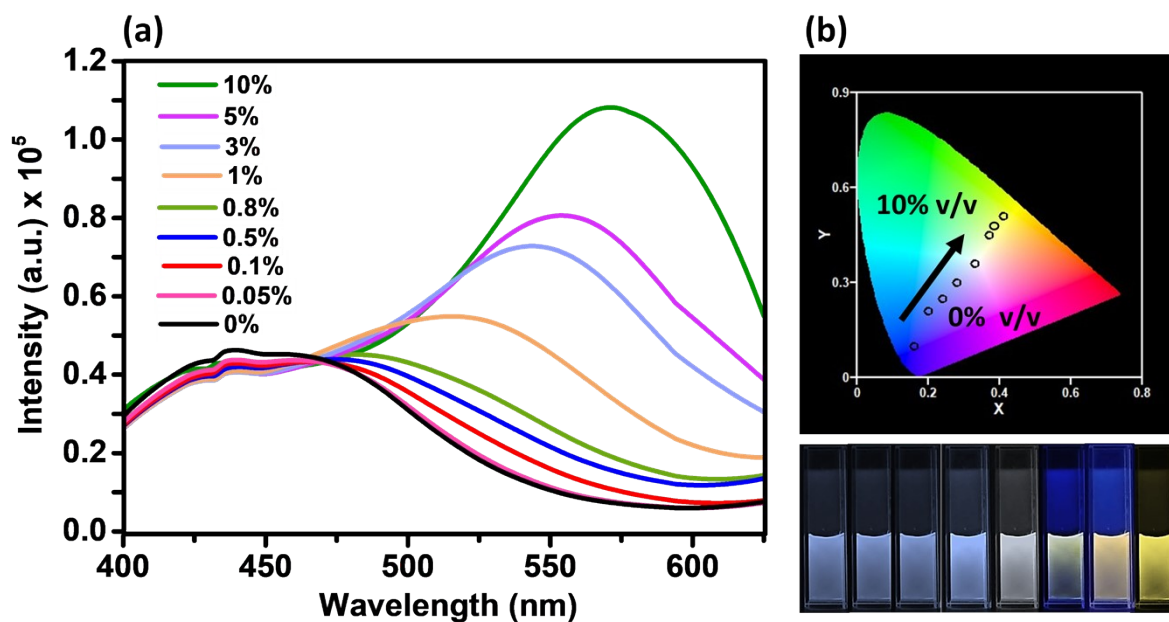

**Fig. S15** (a) Enhanced emission intensity and shift observed upon addition of aliquots of H<sub>2</sub>O to a dispersion of **Zn-db-3** in THF. (b) CIE coordinates depicting the shift in emission and corresponding photographs taken under UV light.

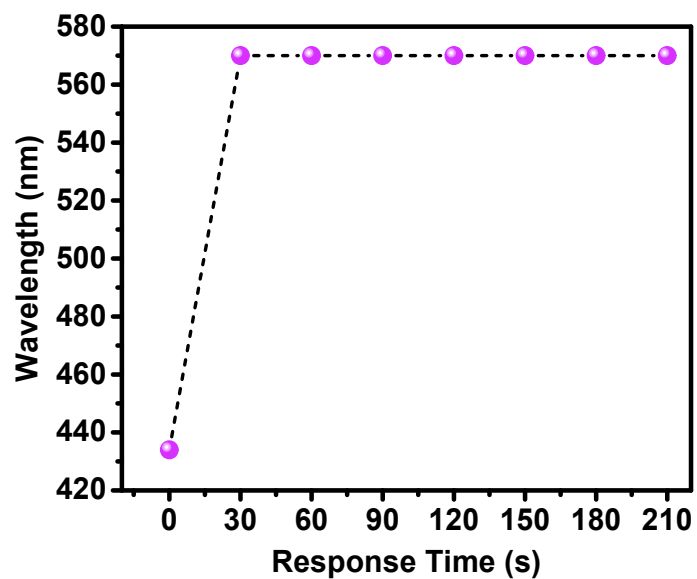

**Fig. S16** Response time of **Zn-db-3** for the detection of 8% v/v H<sub>2</sub>O in THF.

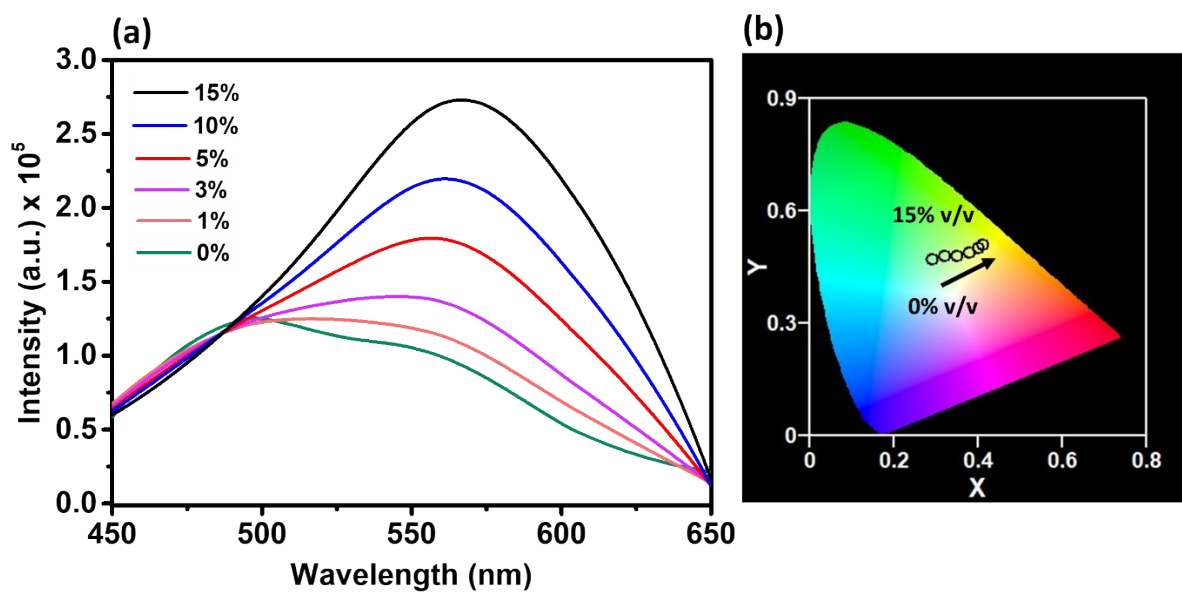

**Fig. S17** (a) Enhanced emission intensity and shift observed upon addition of aliquots of H<sub>2</sub>O to a dispersion of Zn-db in EtOH. (b) CIE coordinates depicting the shift in emission.

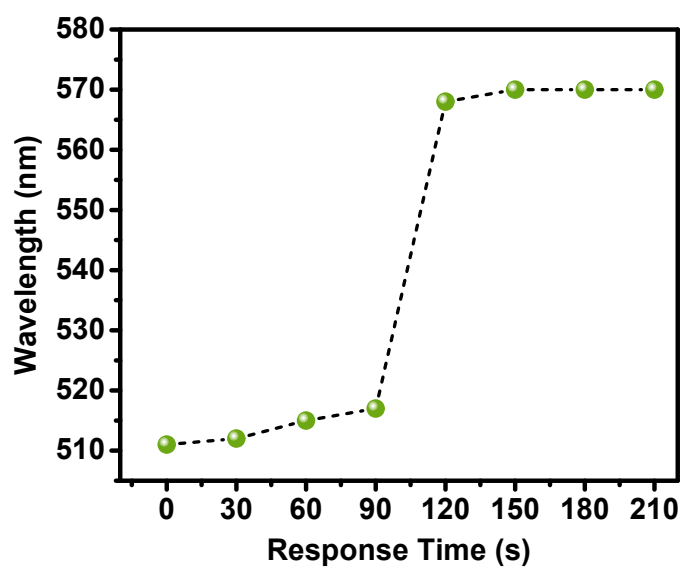

**Fig. S18** Response time of Zn-db for the detection of 8% v/v H<sub>2</sub>O in EtOH.

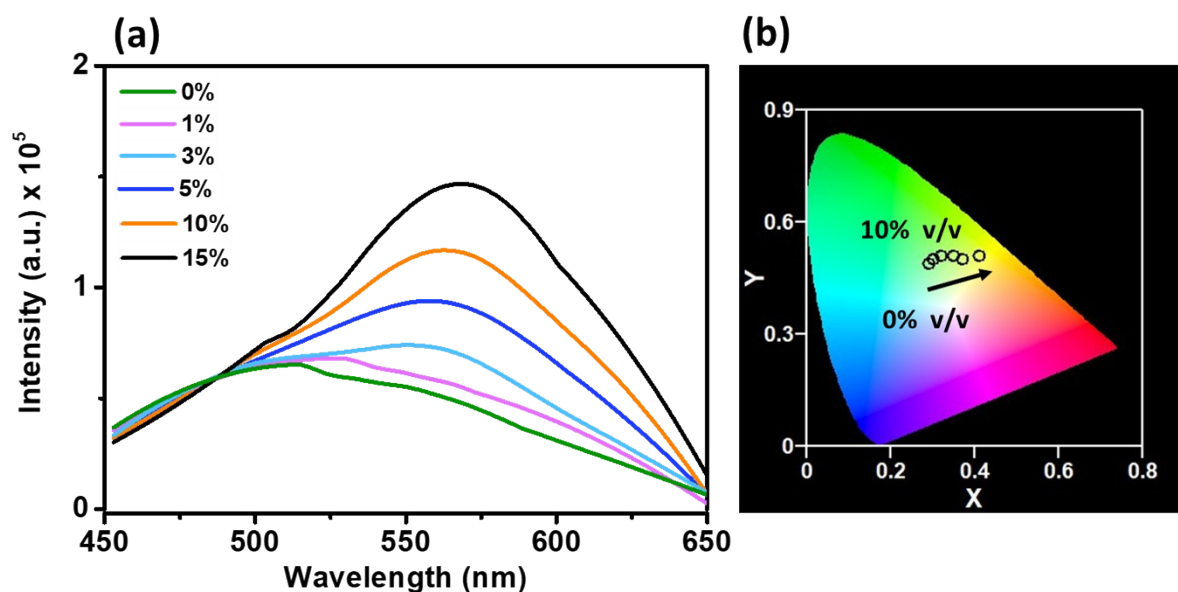

**Fig. S19** (a) Enhanced emission intensity and shift observed upon addition of aliquots of H<sub>2</sub>O to a solution of H<sub>4</sub>DHT in EtOH (0.5 mg/mL). (b) CIE coordinates depicting the shift in emission.

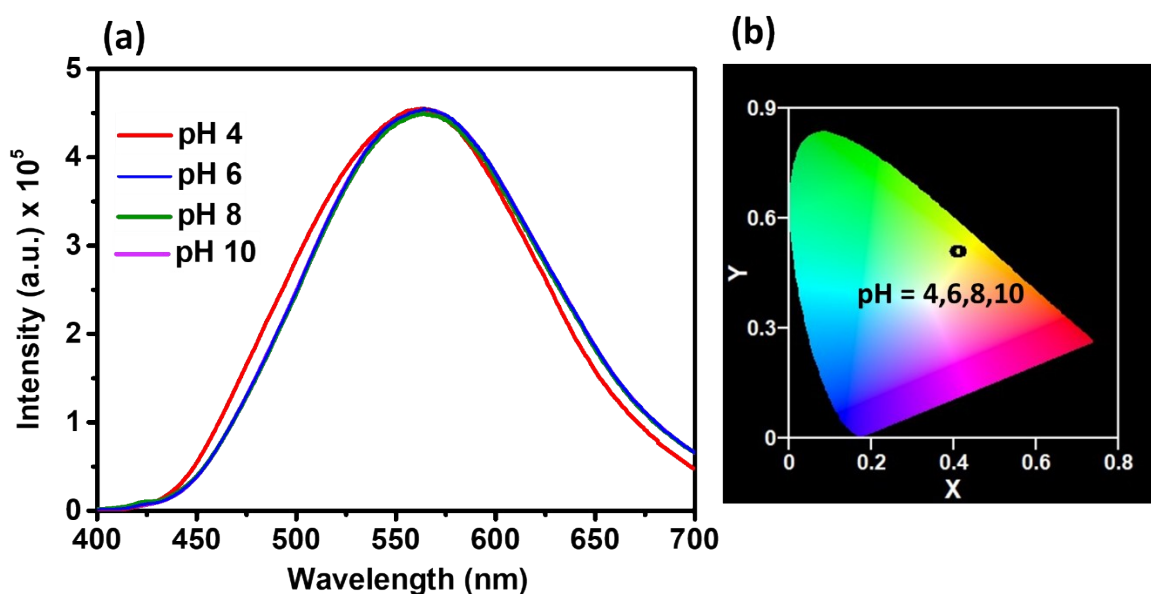

**Fig. S20** (a) PL emission spectra recorded for Zn-db-3 upon exposure to H<sub>2</sub>O in the pH range of 4-10. (b) CIE coordinates depicting the shift in emission.

**Table S7** Comparison of H<sub>2</sub>O sensing performance of luminescent MOF materials

| MOF | Media | LOD<br>(%<br>v/v) | Detection<br>range | Detection<br>Method | Response<br>Time | Ref. |
|-----|-------|-------------------|--------------------|---------------------|------------------|------|
|     |       |                   |                    |                     |                  |      |

|                                                                          |                    |             |              |                                     |                  |                      |
|--------------------------------------------------------------------------|--------------------|-------------|--------------|-------------------------------------|------------------|----------------------|
| Eu <sub>0.02</sub> Dy <sub>0.18</sub> -MOF                               | Ethanol            | 0.1         | 0-0.3%       | Turn-off                            | -                | 7                    |
| Tb <sup>3+</sup> @p-<br>CDs/MOF                                          | DMF                | 0.33        | 0-30%        | Turn-off                            | -                | 8                    |
| Eu <sup>3+</sup> @UiO-66-<br>NH <sub>2</sub> -IM                         | Ethanol            | 0.05        | 0-2%         | Turn-off                            | -                | 9                    |
| MOF@Fe <sub>3</sub> O <sub>4</sub> /SiO <sub>2</sub><br>composite        | Hexane             | 0.03        | 0-10%        | Turn-off                            |                  | 10                   |
| [Cd <sub>2</sub> (4,5-icd)(2,5-<br>tpt)(H <sub>2</sub> O) <sub>4</sub> ] | DMF                | 0.25        | 0-50%        | Shifted<br>emission<br>and turn-off | < 30s            | 11                   |
| LIFM-CL1-H <sub>2</sub> O                                                | Acetonitrile       | 0.05        | 0-1.3%       | Shifted<br>emission                 | -                | 12                   |
| AEMOF-1'                                                                 | THF                | -           | 0-5%         | Shifted<br>emission                 | 60-120s          | 13                   |
| Tb <sub>97.11</sub> Eu <sub>2.89</sub> -L1                               | CH <sub>3</sub> CN | 0.04        | 0-2.5%       | Turn-off                            | -                | 14                   |
| <b>Zn-db-3</b>                                                           | <b>Ethanol</b>     | <b>0.05</b> | <b>0-15%</b> | <b>Shifted<br/>emission</b>         | <b>&lt; 30 s</b> | <b>This<br/>work</b> |
|                                                                          | <b>Methanol</b>    | <b>0.05</b> | <b>0-10%</b> | <b>Shifted<br/>emission</b>         | <b>&lt; 30 s</b> |                      |
|                                                                          | <b>THF</b>         | <b>0.05</b> | <b>0-10%</b> | <b>Shifted<br/>emission</b>         | <b>&lt; 30 s</b> |                      |



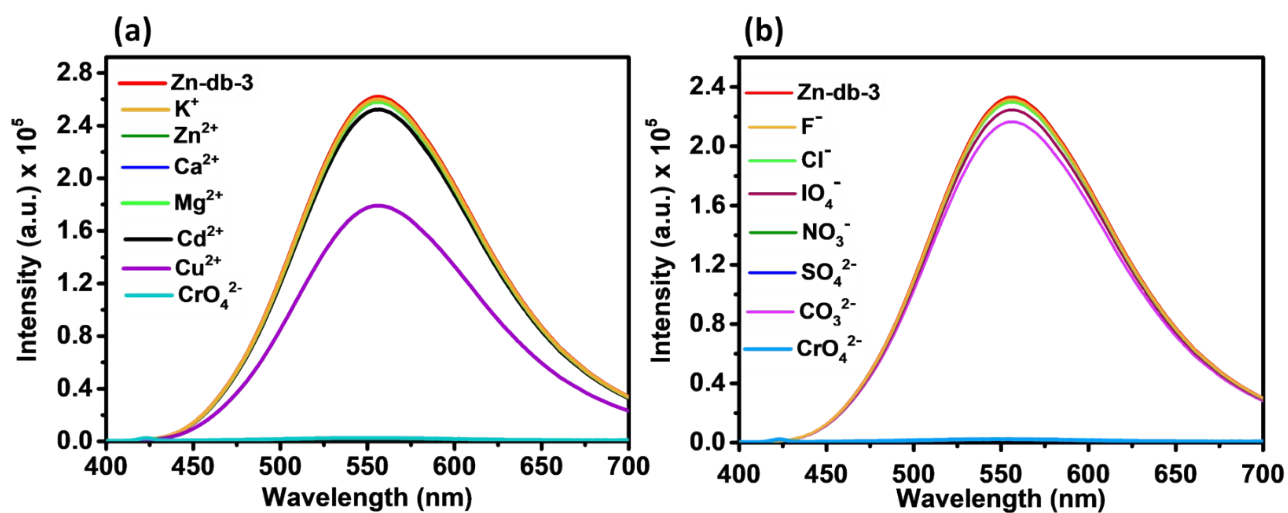

Fig.S21 Influence of competitive (a) cations and (b) anions upon the emission intensity of Zn-db-3 dispersed in H<sub>2</sub>O.

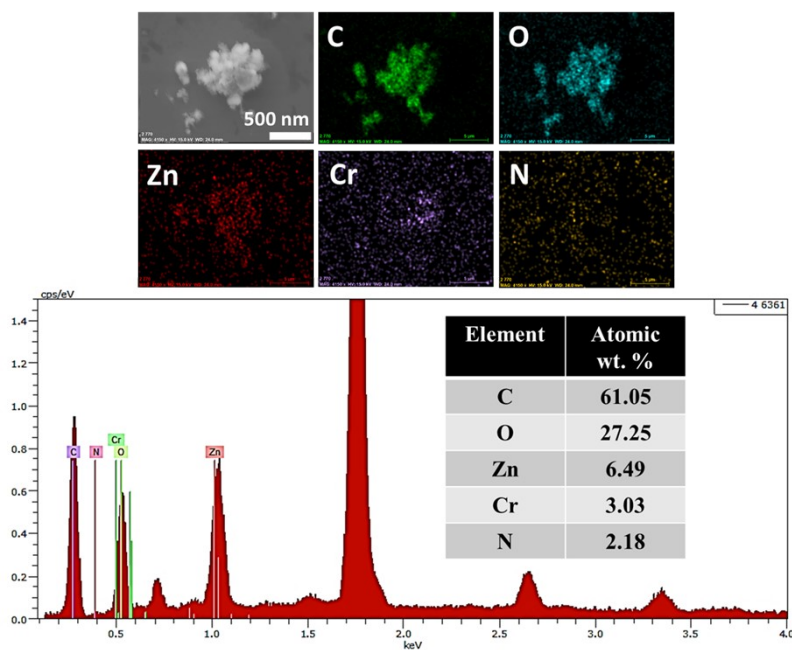

Fig. S22 FESEM and EDX analysis of Cr<sup>6+</sup>@Zn-db-3

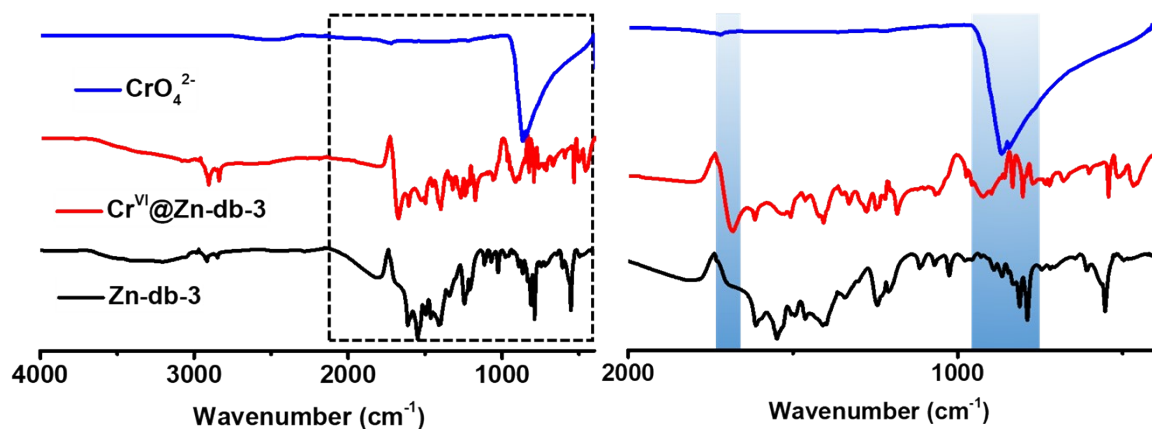

Fig. S23 FTIR spectra of Zn-db-3, Cr<sup>6+</sup>@Zn-db-3, and CrO<sub>4</sub><sup>2-</sup>

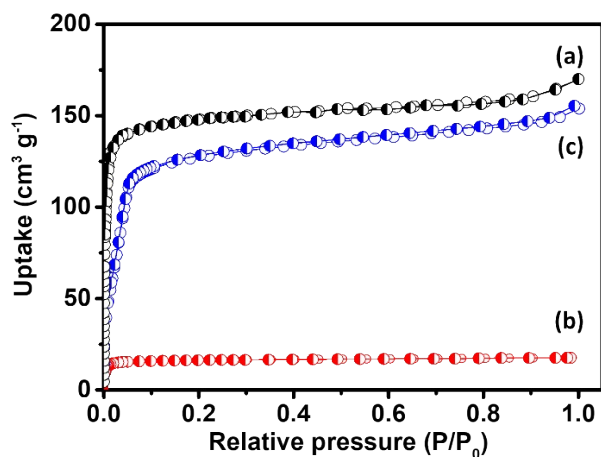

Fig. S24 N<sub>2</sub> adsorption isotherms recorded for (a) Zn-db-3, (b) Cr<sup>6+</sup>@Zn-db-3, and (c) Zn-db-3 recovered after the removal of CrO<sub>4</sub><sup>2-</sup> ions (Unfilled circles represent the adsorption and the half-filled circles represent the desorption isotherm respectively).

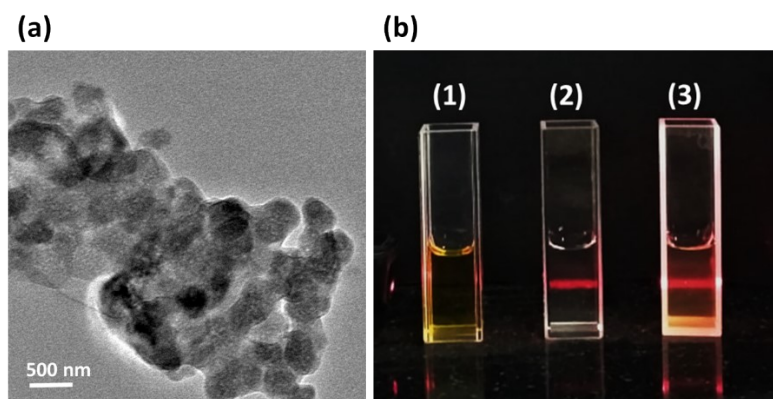

Fig. S25 (a) TEM image of Cr<sup>6+</sup>@Zn-db-3. (b) Tyndall effect for an aqueous solution of CrO<sub>4</sub><sup>2-</sup> ions (1), dispersion of Zn-db-3 in H<sub>2</sub>O (2) and a dispersion of Cr<sup>6+</sup>@Zn-db-3 in H<sub>2</sub>O.

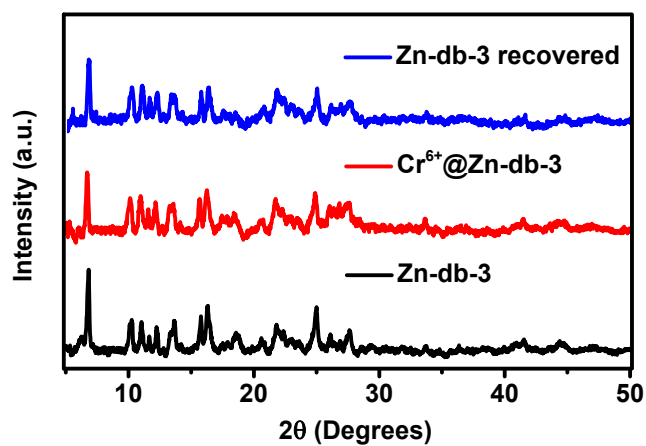

**Fig. S26** PXR D patterns of **Zn-db-3**, **Cr<sup>6+</sup>@Zn-db-3**, and **Zn-db-3** recovered after washing with H<sub>2</sub>O.

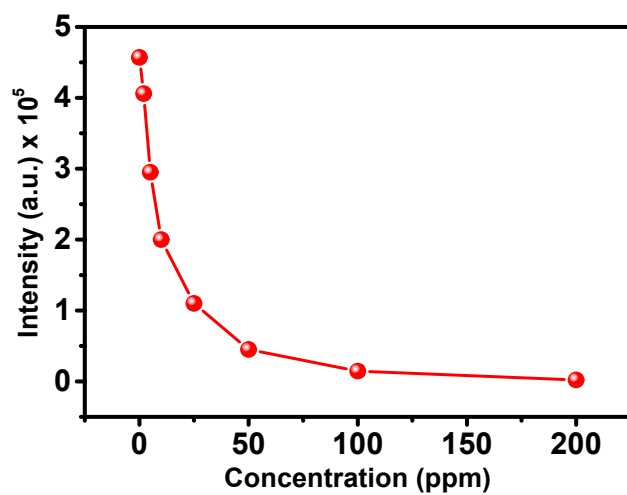

**Fig. S27** Correlation between the luminescence intensity of **Zn-db-3** monitored at 575 nm and the concentration of CrO<sub>4</sub><sup>2-</sup> ions.

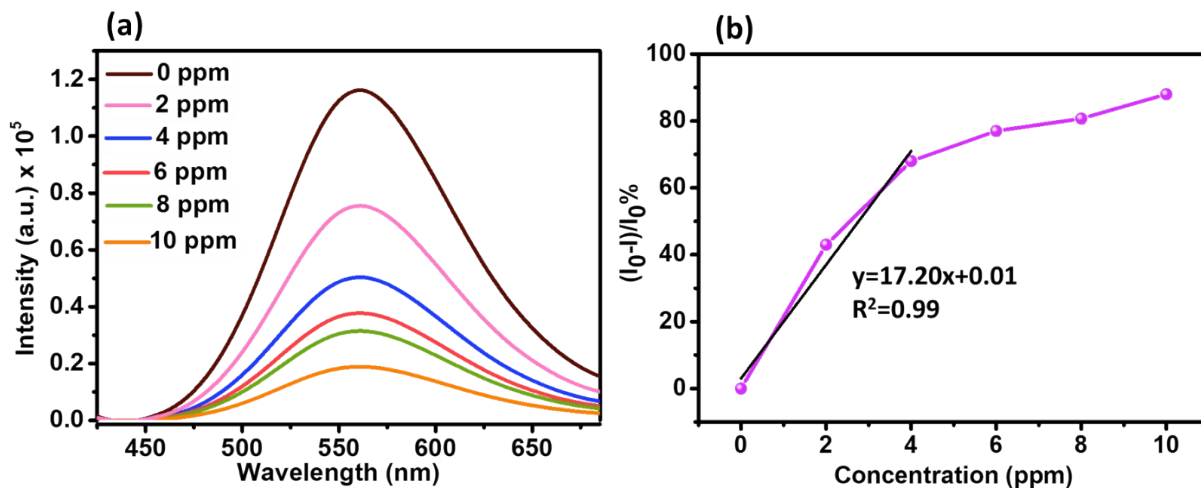

**Fig. S28** (a) Luminescence spectra of **Zn-db-3** in  $\text{CrO}_4^{2-}$  deionized  $\text{H}_2\text{O}$  solutions with concentrations from 0 to 10 ppm. (b) Plot showing the quenching ratio of PL intensity (measured at 575 nm) of **Zn-db-3** as a function of the  $\text{CrO}_4^{2-}$  concentration.

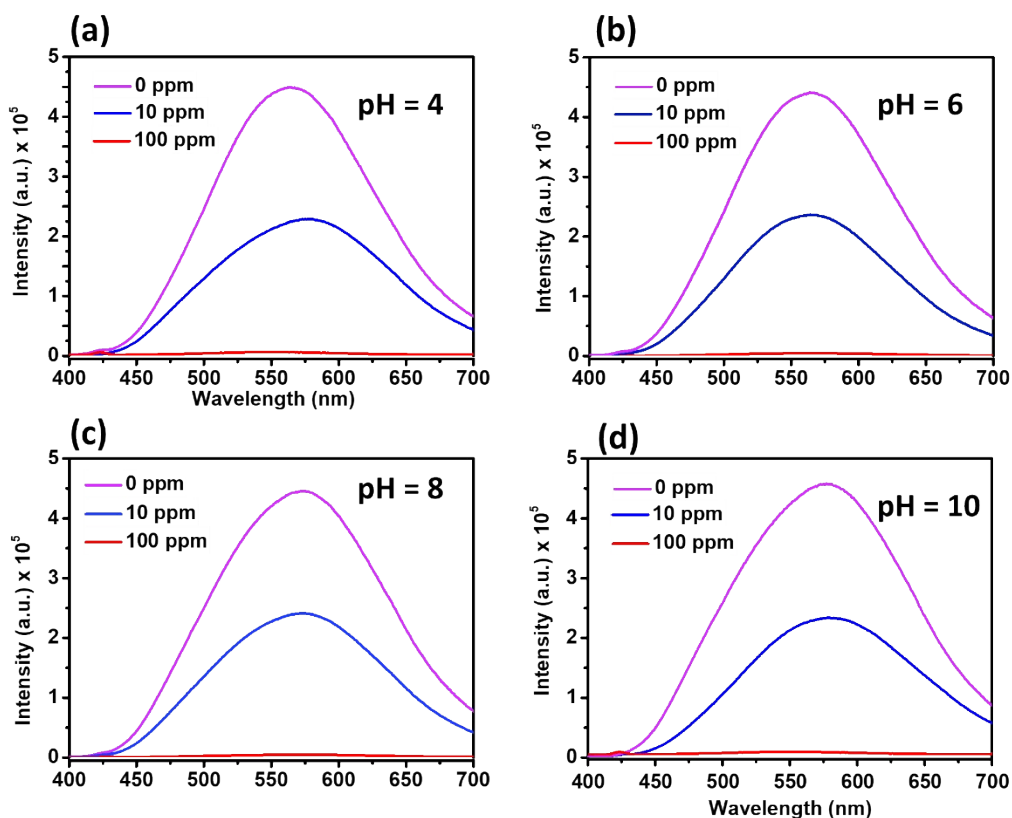

**Fig. S29**  $\text{CrO}_4^{2-}$  sensing analysis by **Zn-db-3** monitored at different pH values (pH = 4,6,8, and 10).

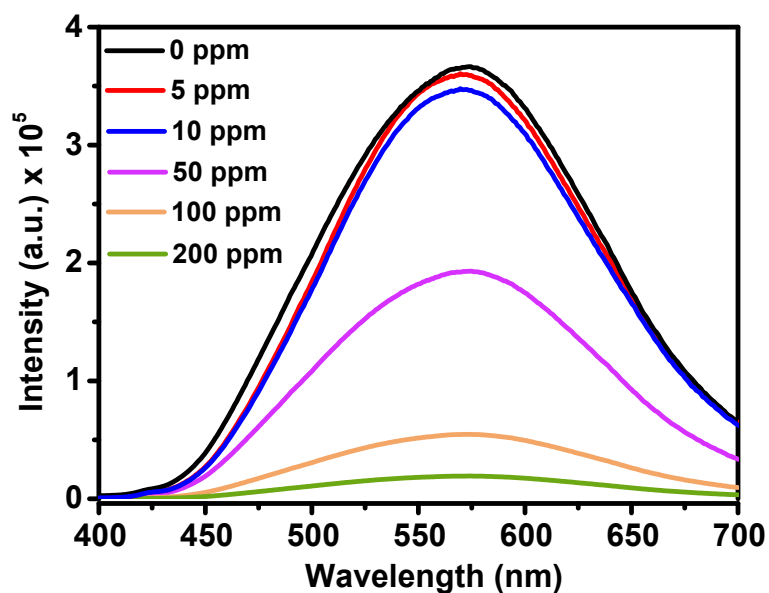

Fig. S30 Titration of an aqueous dispersion of **Zn-db** with  $\text{CrO}_4^{2-}$ .

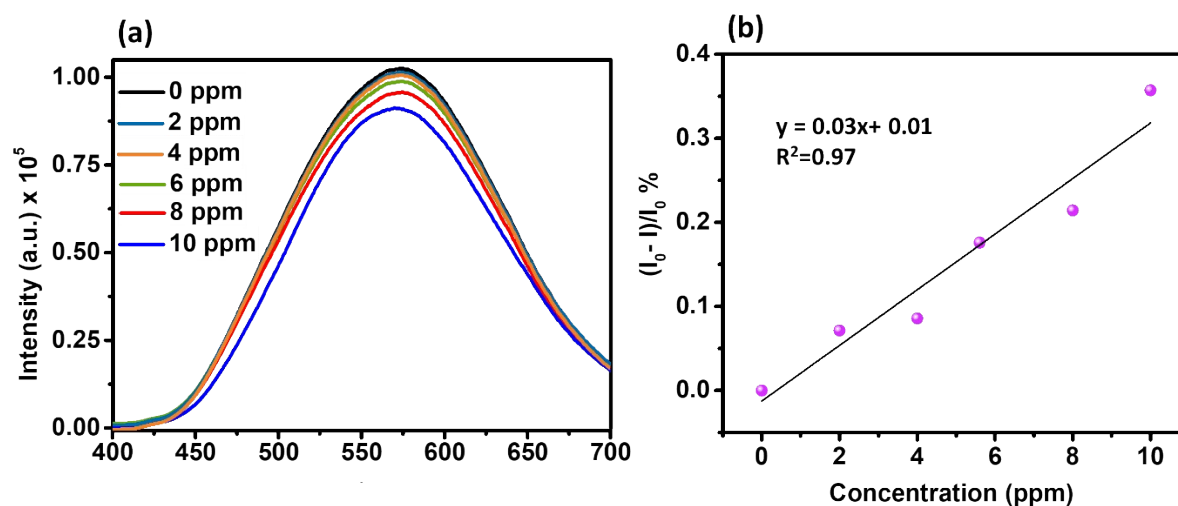

Fig. S31 (a) Luminescence spectra of **Zn-db** in  $\text{CrO}_4^{2-}$  deionized  $\text{H}_2\text{O}$  solutions with concentrations from 0 to 10 ppm. (b) Plot showing the quenching ratio of PL intensity (measured at 575 nm) of **Zn-db** as a function of the  $\text{CrO}_4^{2-}$  concentration.

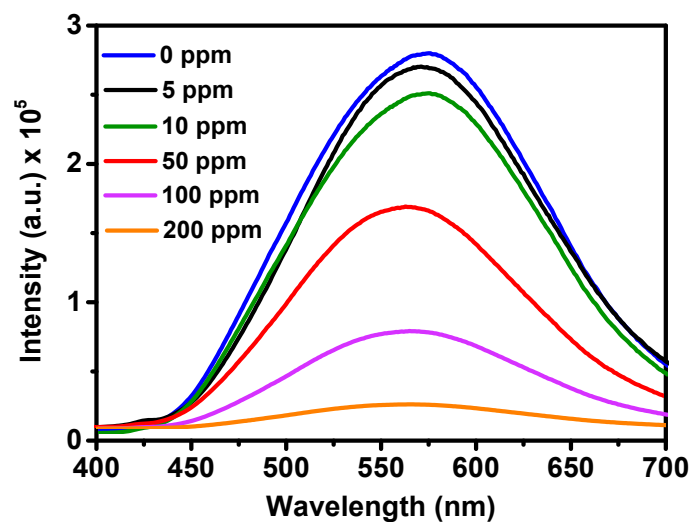

**Fig. S32** Titration of a solution of **H<sub>4</sub>DHT** in H<sub>2</sub>O (0.5 mg/mL) with CrO<sub>4</sub><sup>2-</sup>.

**Table S8** Comparison of CrO<sub>4</sub><sup>2-</sup> sensing performance of luminescent MOF materials

| MOF                                                                                                                                         | LOD (ppb)       | Detection Method        | Response Time    | Ref.             |
|---------------------------------------------------------------------------------------------------------------------------------------------|-----------------|-------------------------|------------------|------------------|
| Cd <sub>6</sub> (L) <sub>2</sub> (bib) <sub>2</sub> (DMA) <sub>4</sub>                                                                      | -               | Turn-off                | 300 s            | 15               |
| Cd <sub>3</sub> (L)(bipy) <sub>2</sub> (DMA) <sub>4</sub>                                                                                   | -               |                         |                  |                  |
| Cd <sub>3</sub> (L)(tib)(DMF) <sub>2</sub>                                                                                                  | -               |                         |                  |                  |
| {[Dy <sub>2</sub> Zn(BPDC) <sub>3</sub> (H <sub>2</sub> O) <sub>4</sub> ](ClO <sub>4</sub> ) <sub>2</sub> ·10H <sub>2</sub> O} <sub>n</sub> | -               | Turn-off                | -                | 16               |
| [Zn(btz)] <sub>n</sub>                                                                                                                      | 52              | Turn-off                | -                | 17               |
| [Zn <sub>2</sub> (ttz)H <sub>2</sub> O] <sub>n</sub>                                                                                        | 104             |                         |                  |                  |
| [Eu <sub>7</sub> (mtb) <sub>5</sub> (H <sub>2</sub> O) <sub>16</sub> ]·NO <sub>3</sub> ·8DMA·18H <sub>2</sub> O                             | 0.56            | Turn-off                | -                | 18               |
| <b>Zn-db-3</b>                                                                                                                              | <b>12 ± 0.3</b> | <b>Shifted emission</b> | <b>&lt; 30 s</b> | <b>This work</b> |

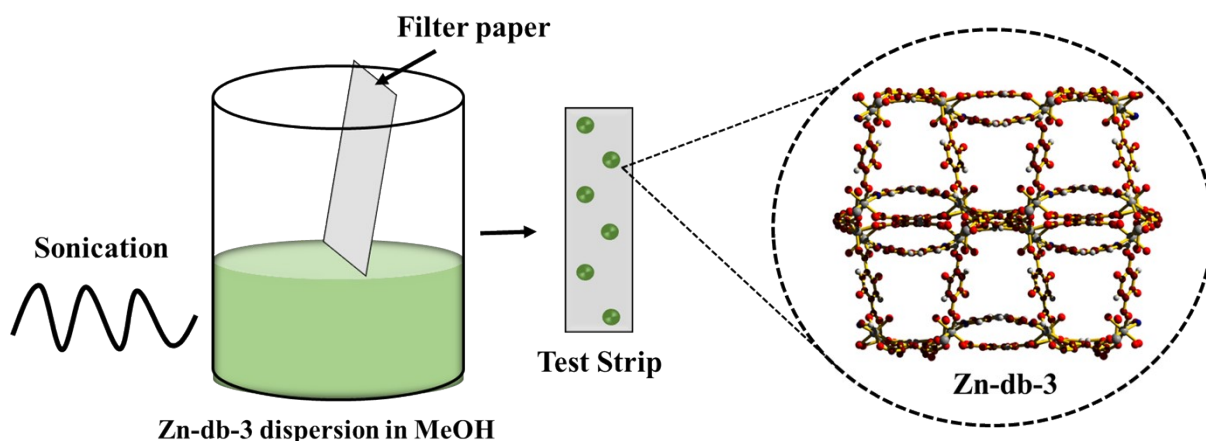

**Fig. S33** Schematic for the fabrication of the luminescent test strip for the detection of  $\text{CrO}_4^{2-}$  ions.

#### References:

1. *SMART (V 5.628), SAINT (V 6.45a), Xprep, SHELXTL; Bruker AXS Inc. Madison, Wisconsin, USA, 2004.*
2. *G. M. Sheldrick, Siemens Area Detector Absorption Correction Program, University of Göttingen, Göttingen, Germany, 1994.*
3. A. Altomare, G. Cascarano, C. Giacovazzo, A. Guagliardi, M. C. Burla, G. Polidori and M. Camalli, *J. Appl. Crystallogr.*, 1994, **27**, 435-435.
4. *G. M. Sheldrick, SHELXL-97, Program for Crystal Structure Solution and Refinement, University of Göttingen, Göttingen, Germany, 1997.*
5. A. L. Spek, *J. Appl. Crystallogr.*, 2003, **36**.
6. *L. J. Farrugia, WinGX-A Windows Program for Crystal Structure Analysis, J. Appl. Crystallogr.*, 1999, **32**.
7. L.-L. Wu, J. Zhao, H. Wang and J. Wang, *CrystEngComm*, 2016, **18**, 4268-4271.
8. J.-X. Wu and B. Yan, *Dalton Trans.*, 2017, **46**, 7098-7105.
9. S.-Y. Zhu and B. Yan, *Ind. Eng. Chem. Res.*, 2018, **57**, 16564-16571.
10. T. Wehner, K. Mandel, M. Schneider, G. Sextl and K. Müller-Buschbaum, *ACS Appl. Mater. Interfaces*, 2016, **8**, 5445-5452.
11. J. Othong, J. Boonmak, F. Kielar and S. Youngme, *ACS Appl. Mater. Interfaces*, 2020, **12**, 41776-41784.

12. L. Chen, J.-W. Ye, H.-P. Wang, M. Pan, S.-Y. Yin, Z.-W. Wei, L.-Y. Zhang, K. Wu, Y.-N. Fan and C.-Y. Su, *Nat. Commun.*, 2017, **8**, 15985.
13. A. Douvali, A. C. Tsipis, S. V. Eliseeva, S. Petoud, G. S. Papaefstathiou, C. D. Malliakas, I. Papadas, G. S. Armatas, I. Margiolaki, M. G. Kanatzidis, T. Lazarides and M. J. Manos, *Angew. Chem. Int. Ed.*, 2015, **54**, 1651-1656.
14. B. Li, W. Wang, Z. Hong, E.-S. M. El-Sayed and D. Yuan, *Chem. Commun.*, 2019, **55**, 6926-6929.
15. F.-Y. Yi, J.-P. Li, D. Wu and Z.-M. Sun, *Chem. Eur. J.*, 2015, **21**, 11475-11482.
16. P.-F. Shi, B. Zhao, G. Xiong, Y.-L. Hou and P. Cheng, *Chem. Commun.*, 2012, **48**, 8231-8233.
17. C.-S. Cao, H.-C. Hu, H. Xu, W.-Z. Qiao and B. Zhao, *CrystEngComm*, 2016, **18**, 4445-4451.
18. W. Liu, Y. Wang, Z. Bai, Y. Li, Y. Wang, L. Chen, L. Xu, J. Diwu, Z. Chai and S. Wang, *ACS Appl. Mater. Interfaces*, 2017, **9**, 16448-16457.
